# Supplementary material for: miR-138-5p Inhibits Vascular Mimicry by Targeting the HIF-1α/VEGFA Pathway in Hepatocellular Carcinoma
Source: Hindawi journal article supplement (doi:10.1155/2022/7318950), 2022-05-28
Supplement: f1 [file 7318950.f1.pdf]

Supplement table 1 Sequences of primers sequences used in this study

| Name           |              | Sequences                 |
|----------------|--------------|---------------------------|
| miR-138-5p     | sense        | GCTTAAGGCACGCGG           |
|                | antisense    | GTGCAGGGTCCGAGG           |
| U6             | sense        | CTCGCTTCGGCAGCACA         |
|                | antisense    | AACGCTTCACGAATTTGCGT      |
| $\beta$ -actin | sense        | TGGCACCCAGCACAATGAA       |
|                | antisense    | CTAAGTCATAGTCCGCCTAGAAGCA |
| HIF-1 $\alpha$ | sense        | GAACGTCGAAAAGAAAAGTCTCG   |
|                | antisense    | CCTTATCAAGATGCGAACTCACA   |
| VEGFA          | sense        | AGGGCAGAATCATCACGAAGT     |
|                | antisense    | AGGGTCTCGATTGGATGGCA      |
| miR-138-5p     | mimics       | AGCUGGUGUUGUGAAUCAGGCCG   |
|                | mimics-NC    | UUCUCCGAACGUGUCACGUTT     |
|                | inhibitor    | CGGCCUGAUUCACAACACCAGCU   |
|                | inhibitor-NC | CAGUACUUUUGUGUAGUACAA     |
